# Supplementary material for: The impact of FGF19/FGFR4 signaling inhibition in antitumor activity of multi-kinase inhibitors in hepatocellular carcinoma
Source: PubMed Central journal article supplement (PMC7935880; doi:10.1038/s41598-021-84117-9), 2021-03-05
Supplement: 41598_2021_84117_MOESM1_ESM.pdf [file 41598_2021_84117_MOESM1_ESM.pdf]

**The impact of FGF19/FGFR4 signaling inhibition in antitumor activity of multi-kinase inhibitors in hepatocellular carcinoma**

**Authors:**

Hiroaki Kanzaki<sup>1</sup>, Tetsuhiro Chiba<sup>1, \*</sup>, Junjie Ao<sup>1</sup>, Keisuke Koroki<sup>1</sup>, Kengo Kanayama<sup>1</sup>, Susumu Maruta<sup>1</sup>, Takahiro Maeda<sup>1</sup>, Yuko Kusakabe<sup>1</sup>, Kazufumi Kobayashi<sup>1</sup>, Naoya Kanogawa<sup>1</sup>, Soichiro Kiyono<sup>1</sup>, Masato Nakamura<sup>1</sup>, Takayuki Kondo<sup>1</sup>, Tomoko Saito<sup>1</sup>, Ryo Nakagawa<sup>1</sup>, Sadahisa Ogasawara<sup>1</sup>, Eiichiro Suzuki<sup>1</sup>, Yoshihiko Ooka<sup>1</sup>, Ryosuke Muroyama<sup>2</sup>, Shingo Nakamoto<sup>1</sup>, Shin Yasui<sup>1</sup>, Akinobu Tawada<sup>1</sup>, Makoto Arai<sup>1</sup>, Tatsuo Kanda<sup>3</sup>, Hitoshi Maruyama<sup>4</sup>, Naoya Mimura<sup>5</sup>, Jun Kato<sup>1</sup>, Yoh Zen<sup>6</sup>, Masayuki Ohtsuka<sup>7</sup>, Atsushi Iwama<sup>8</sup>, Naoya Kato<sup>1</sup>

**Institutions:**

<sup>1</sup> Department of Gastroenterology, Graduate School of Medicine, Chiba University, 1-8-1 Inohana, Chuo-ku, Chiba 260-8670, Japan

<sup>2</sup> Department of Molecular Virology, Graduate School of Medicine, Chiba University, 1-8-1 Inohana, Chuo-ku, Chiba 260-8670, Japan

<sup>3</sup> Department of Gastroenterology and Hepatology, Nihon University School of Medicine, 30-1 Oyaguchi-Kamicho, Itabashi-ku, Tokyo 173-8610, Japan

<sup>4</sup> Department of Gastroenterology, Juntendo University School of Medicine, 2-1-1 Hongo, Bunkyo-ku, Tokyo 113-8421, Japan

<sup>5</sup> Department of Transfusion Medicine and Cell Therapy, Chiba University Hospital, 1-8-1 Inohana, Chuo-ku, Chiba 260-8670, Japan

<sup>6</sup> Institute of Liver Studies, King's College Hospital, London, UK

<sup>7</sup> Department of General Surgery, Graduate School of Medicine, Chiba University, 1-8-1 Inohana, Chuo-ku, Chiba 260-8670, Japan

<sup>8</sup> Division of Stem Cell and Molecular Medicine, Center for Stem Cell Biology and Regenerative Medicine, The Institute of Medical Science, The University of Tokyo, 4-6-1 Shirokanedai, Minato-ku, Tokyo 108-8639, Japan

**\*Corresponding author:**

Tetsuhiro Chiba, M.D., PhD.

Department of Gastroenterology, Graduate School of Medicine, Chiba University, 1-8-1 Inohana, Chuo-ku, Chiba 260-8670, Japan.

Telephone: +81-43-2262083, Fax: +81-43-2262088

E-mail: [chibat@chiba-u.jp](mailto:chibat@chiba-u.jp)

**Supplementary Table S1.** Biochemical IC50 values (nmol/L) of MKIs.

|                | <b>Sorafenib</b> | <b>Lenvatinib</b> | <b>Regorafenib</b> | <b>Cabozantinib</b> |
|----------------|------------------|-------------------|--------------------|---------------------|
| VEGFR-1        | 21               | 4.7               | 13                 | NA                  |
| VEGFR-2        | 21               | 3                 | 4.2                | 14                  |
| VEGFR-3        | 16               | 2.3               | 46                 | NA                  |
| FGFR1          | 340              | 61                | 202                | NA                  |
| FGFR2          | 150              | 27                | NA                 | NA                  |
| FGFR3          | 340              | 52                | NA                 | NA                  |
| FGFR4          | 3400             | 43                | NA                 | NA                  |
| PDGFR $\alpha$ | 1.6              | 29                | NA                 | NA                  |
| PDGFR $\beta$  | 27               | 160               | 22                 | 575                 |
| c-KIT          | 140              | 85                | 7                  | 752                 |
| RET            | 15               | 6.4               | 1.5                | 8                   |
| MET            | NA               | NA                | NA                 | 2                   |
| AXL            | NA               | NA                | NA                 | 8                   |

Abbreviations, NA: not applicable

**Supplementary Table S2.** Clinical features of serum FGF19<sup>high</sup> and FGF19<sup>low</sup> patients treated using sorafenib.

| Characteristics                   | FGF19 <sup>low</sup><br>(n=105) | FGF19 <sup>high</sup><br>(n=68) | <i>p</i> -value     |
|-----------------------------------|---------------------------------|---------------------------------|---------------------|
| Age (years) (median (IQR))        | 72 (12)                         | 74 (12)                         | 0.104               |
| Gender: male / female             | 81/24                           | 56/12                           | 0.410               |
| Etiology: HBV /HCV / others       | 16/51/38                        | 13/26/29                        | 0.407               |
| Child-Pugh grade: A / B           | 87/18                           | 54/14                           | 0.569               |
| FGF19 (pg/ml) (median (IQR))      | 111.4 (65.1)                    | 325.0 (298.4)                   | <0.001 <sup>a</sup> |
| AFP (ng/ml) (median (IQR))        | 254.2 (26629.5)                 | 87.3 (2236.4)                   | 0.528               |
| Tumor diameter (cm): >6 / ≤6      | 34/71                           | 21/47                           | 0.836               |
| Tumor number: ≥7 / <7             | 53/52                           | 36/32                           | 0.751               |
| Macrovascular invasion: yes / no  | 34/71                           | 22/46                           | 0.997               |
| Extrahepatic metastasis: yes / no | 39/66                           | 21/47                           | 0.398               |
| BCLC stage: A / B / C             | 3/38/64                         | 1/26/41                         | 0.822               |

<sup>a</sup> Significant.

**Supplementary Table S3.** Clinical features of serum FGF19<sup>high</sup> and FGF19<sup>low</sup> patients treated using lenvatinib.

| Characteristics                   | FGF19 <sup>low</sup><br>(n=19) | FGF19 <sup>high</sup><br>(n=21) | <i>p</i> -value     |
|-----------------------------------|--------------------------------|---------------------------------|---------------------|
| Age (years) (median (IQR))        | 73 (11)                        | 72 (15)                         | 0.936               |
| Gender: male / female             | 14/5                           | 16/5                            | 0.855               |
| Etiology: HBV /HCV / others       | 2/4/13                         | 1/8/12                          | 0.447               |
| Child-Pugh grade: A / B           | 15/4                           | 14/7                            | 0.385               |
| FGF19 (pg/ml) (median (IQR))      | 135.4 (50.9)                   | 307.5 (143.3)                   | <0.001 <sup>a</sup> |
| AFP (ng/ml) (median (IQR))        | 221.0 (966.4)                  | 34.6 (122.9)                    | 0.247               |
| Tumor diameter (cm): >6 / ≤6      | 7/12                           | 11/10                           | 0.324               |
| Tumor number: ≥7 / <7             | 11/8                           | 10/11                           | 0.516               |
| Macrovascular invasion: yes / no  | 8/11                           | 5/16                            | 0.217               |
| Extrahepatic metastasis: yes / no | 7/12                           | 4/17                            | 0.208               |
| BCLC stage: A / B / C             | 0/6/13                         | 3/8/10                          | 0.166               |

<sup>a</sup> Significant.

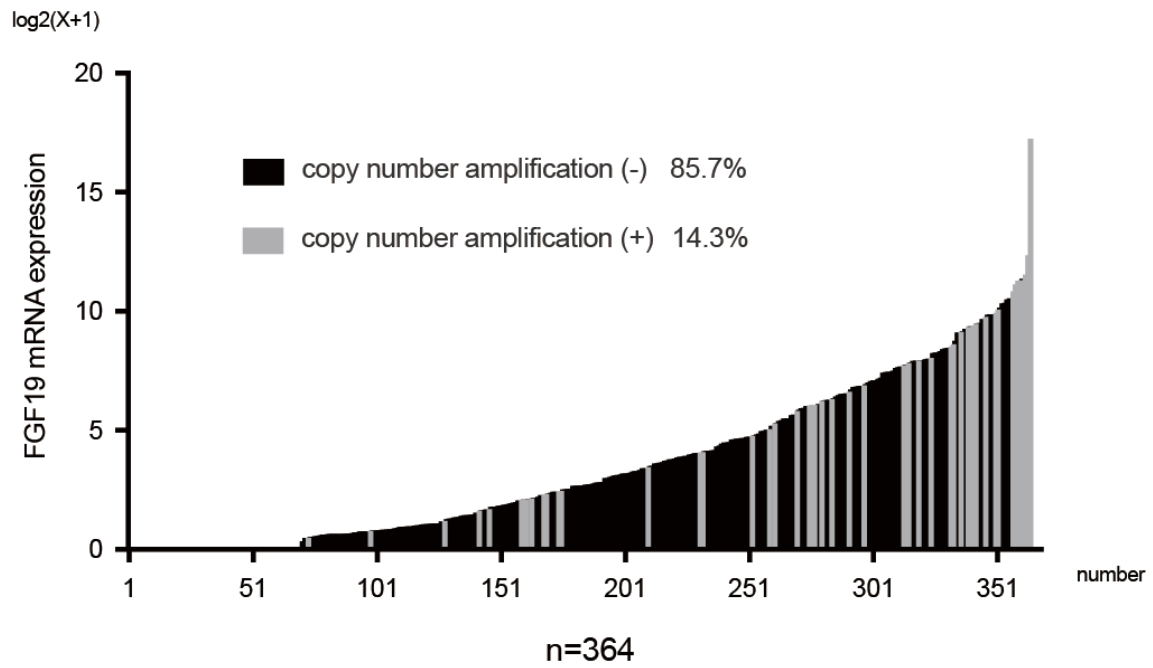

**Supplementary Figure S1.** Data collection and analysis of TCGA-LIHC. The correlation between the FGF19 mRNA level and FGF19 gene amplification in primary HCC (n=364) was depicted.

Figure 1C

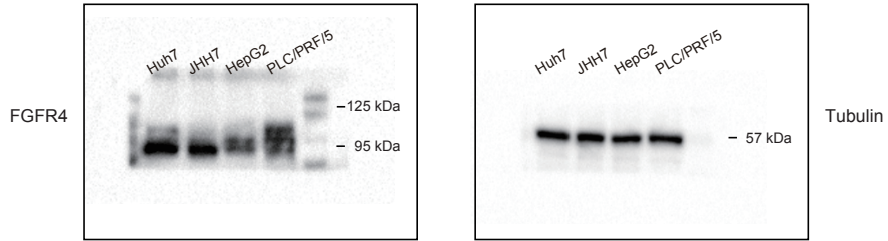

Figure 1E

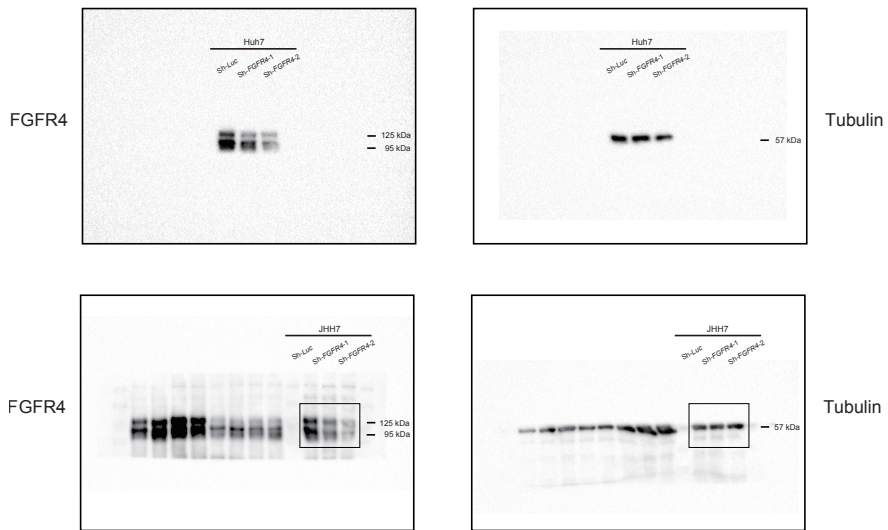

Supplementary Figure S2. Uncropped Western blot images of Figure 1C and Figure1E.

Figure 2B

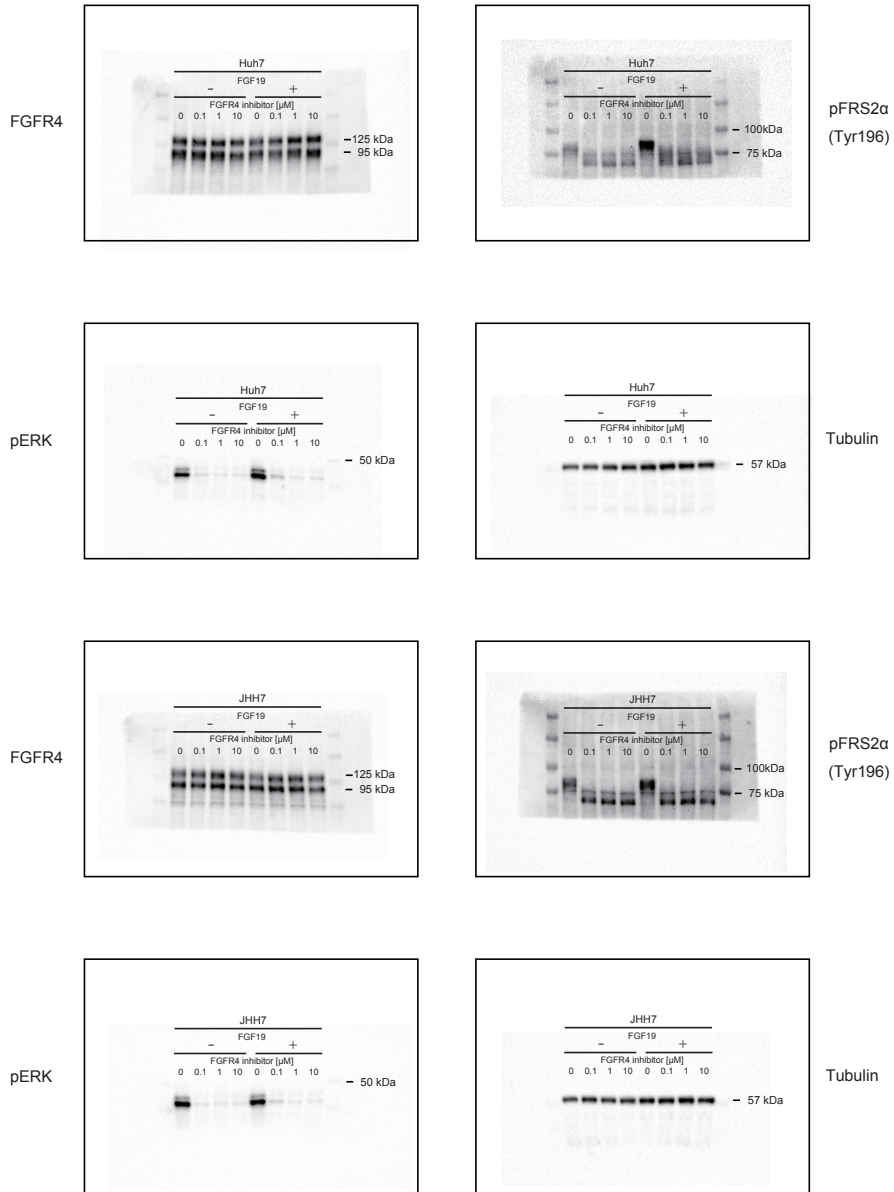

Supplementary Figure S3. Uncropped Western blot images of Figure 2B.



Figure 3A

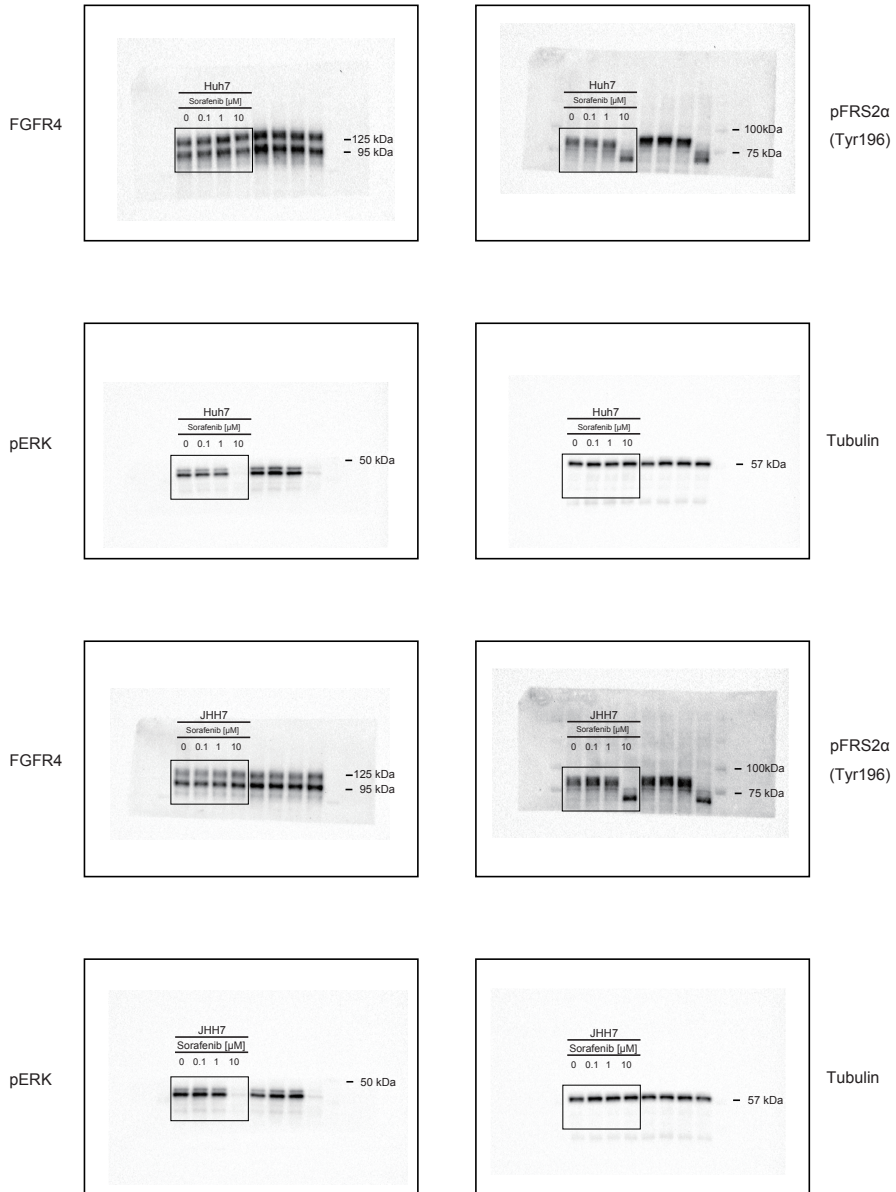

Supplementary Figure S4. Uncropped Western blot images of Figure 3A (left column).

Figure 3A

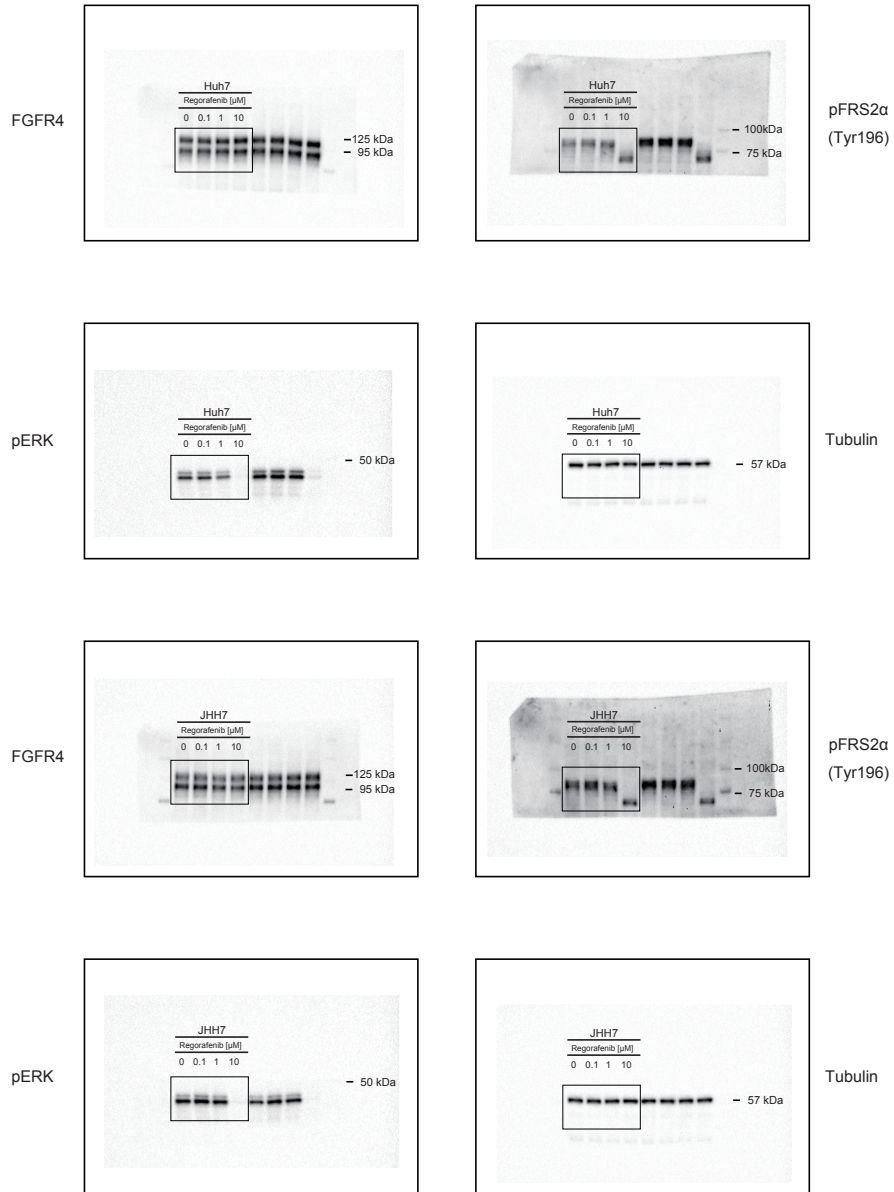

Supplementary Figure S5. Uncropped Western blot images of Figure 3A (middle column).

Figure 3A

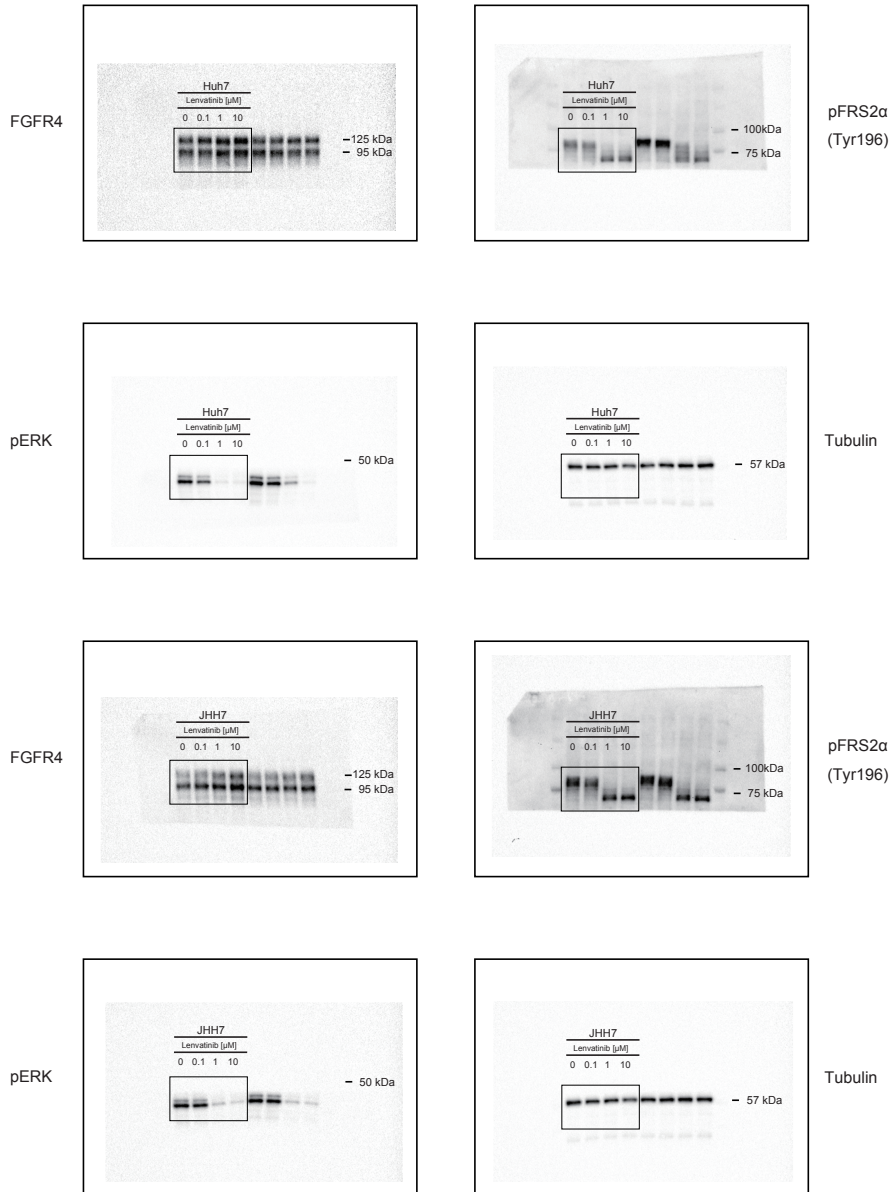

Supplementary Figure S6. Uncropped Western blot images of Figure 3A (right column).

Figure 3B

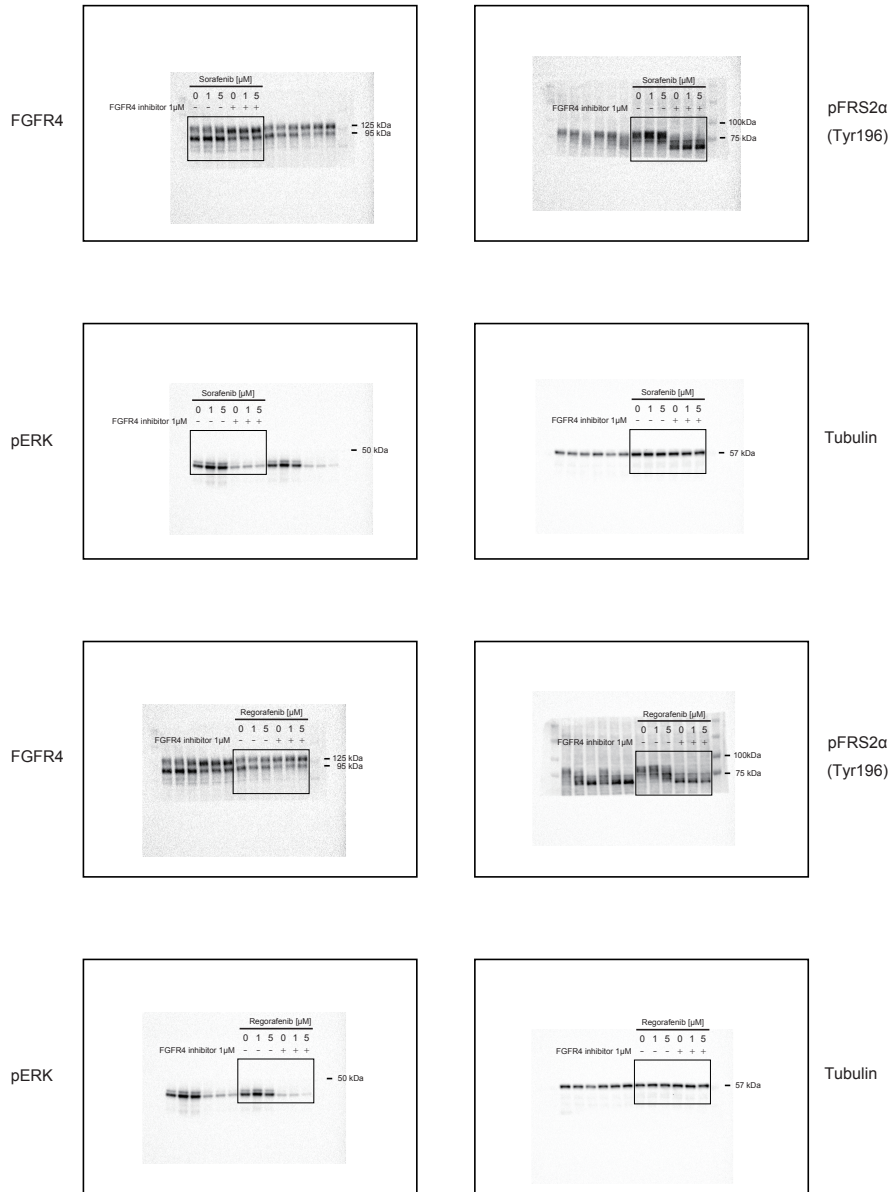

Supplementary Figure S7. Uncropped Western blot images of Figure 3B.
